# Supplementary material for: Efficient and accurate detection of splice junctions from RNA-seq with Portcullis
Source: PubMed Central journal article supplement (PMC6302956; doi:10.1093/gigascience/giy131), 2018-12-12
Supplement: giy131_reviewer-1-report-revision-1.pdf [file giy131_reviewer-1-report-revision-1.pdf]

## Reviewer Report

### Title: **Efficient and accurate detection of splice junctions from RNA-Seq with Portcullis**

Version: **Revision 1** Date: 9/17/2018

Reviewer name: **Shihao Shen**

#### Reviewer Comments to Author:

I only have one remaining comment, relating to my previous comment 3. In figure 4, the use of the term "2PASS" in the labels is misleading, as its meaning in this figure differs between STAR and HISAT2. For STAR, it signifies the use of a built-in 2-pass mode. In contrast, for HISAT2 it signifies running HISAT2 a second time using input from portcullis. The arrows in the figure indicate this, but the terminology is still confusing. To fix this, I suggest changing the label "HISAT2(2PASS)" to "HISAT2 - Portcullis - HISAT2" and changing "HISAT2(2PASS) - Portcullis" to "HISAT2 - Portcullis - HISAT2 - Portcullis", or perhaps "(HISAT2 - Portcullis) x 2" for brevity. That would be consistent with the structure of the other labels in the figure (using dashes to signify that one program is run after another), and would be clearer for the reader. In addition, I suggest clarifying this aspect in the main text. For example, after the sentence ending in "...during the alignment process" on page 4, one could add a sentence "The effect of applying this strategy with HISAT2 is shown in Figure 4 (upper right corner), and it could be similarly applied with other mappers".

Relating to my previous comment 7, the font is actually larger in the revised version. Thanks!

#### Level of Interest

Please indicate how interesting you found the manuscript: Choose an item.

#### Quality of Written English

Please indicate the quality of language in the manuscript: Choose an item.

#### Declaration of Competing Interests

Please complete a declaration of competing interests, considering the following questions:

- Have you in the past five years received reimbursements, fees, funding, or salary from an organisation that may in any way gain or lose financially from the publication of this manuscript, either now or in the future?
- Do you hold any stocks or shares in an organisation that may in any way gain or lose financially from the publication of this manuscript, either now or in the future?
- Do you hold or are you currently applying for any patents relating to the content of the manuscript?
- Have you received reimbursements, fees, funding, or salary from an organization that holds or has applied for patents relating to the content of the manuscript?
- Do you have any other financial competing interests?
- Do you have any non-financial competing interests in relation to this paper?

If you can answer no to all of the above, write 'I declare that I have no competing interests' below. If your reply is yes to any, please give details below.

I declare that I have no competing interests

I agree to the open peer review policy of the journal. I understand that my name will be included on my report to the authors and, if the manuscript is accepted for publication, my named report including any attachments I upload will be posted on the website along with the authors' responses. I agree for my report to be made available under an Open Access Creative Commons CC-BY license (<http://creativecommons.org/licenses/by/4.0/>). I understand that any comments which I do not wish to be included in my named report can be included as confidential comments to the editors, which will not be published.

I agree to the open peer review policy of the journal

To further support our reviewers, we have joined with Publons, where you can gain additional credit to further highlight your hard work (see: <https://publons.com/journal/530/gigascience>). On publication of this paper, your review will be automatically added to Publons, you can then choose whether or not to claim your Publons credit. I understand this statement. Yes
